# Supplementary material for: Proteomics-Based RT-qPCR and Functional Analysis of 18 Genes in Metronidazole Resistance of Bacteroides fragilis
Source: MDPI journal article supplement (doi:10.3390/antibiotics13030207), 2024-02-22
Supplement: s1 [file s1]

## Supplementary material

**Table S1.** RT-qPCR target genes and primer sequences

| Gene id. Bf          | MS <sup>a</sup> | Ref.                    | Description/Name                                                                | Cellular pathway <sup>b</sup> | Primer designation     | sequence F(1) <sup>d</sup> | sequence R(2) <sup>d</sup> |
|----------------------|-----------------|-------------------------|---------------------------------------------------------------------------------|-------------------------------|------------------------|----------------------------|----------------------------|
| 638R                 | FC              |                         |                                                                                 |                               |                        |                            |                            |
| 1 BF638R_0963        | 8,30            | [24]                    | FprA family A-type flavoprotein ( <i>fprA</i> )                                 | 1                             | fprA1/2                | TAACGACCGTAACANGCACC       | GATCAGTGCCACCATTTCAT       |
| 2 BF638R_1663        | 10,55           | [24]                    | galactokinase ( <i>galK</i> )                                                   | 1                             | galK1/2                | TGGCAGANGCAAAAGCTGAT       | YTCGTAAAGTTTGCTCATGC       |
| 3 BF638R_1728        | -2,95           | [24]                    | exo-alpha-sialidase ( <i>nanH</i> )                                             | 2                             | nanH1/2                | TGTGTGCTATACCGTAGTT        | GTCTGGCTCTTTAGCATC         |
| 4 BF638R_3176        | 8,40            | [24]                    | BmeB15 ( <i>acr15</i> )                                                         | 2                             | act15-1/2              | AGTATCGATCACCTTCGGAA       | TACTTGCTGTCGTTCACTTC       |
| 5 BF638R_3999        | 9,10            | [24]                    | BmeB5 ( <i>acr5</i> )                                                           | 2                             | acr51/2                | CCTATCGACTTGATCCGGA        | ATTCAGCGTATTCTCCAACG       |
| 6 BF638R_2281        | 4,00            | [24]                    | RelA/SpoT family protein ( <i>relA</i> )                                        | 5                             | relA_1/2               | CGTGACCGTTATATTGCCAA       | ACTGGCATTCTGTTTCTTCA       |
| 7 BF638R_1701        | 22,80           | [24]                    | 50S ribosomal protein L20                                                       | 4                             | L20_31/2               | CGTGACCGTAGAAACAAGAA       | AAGTCAGCCAAAACCTTACG       |
| 8 BF638R_4035        | 15,10           | [24]                    | 30S ribosomal protein S3                                                        | 4                             | S3-1/2                 | GTGGCCAGGAAGTTGATAAG       | ACAATCACAGCATCCAGTTC       |
| 9 BF638R_3828        | -               | This study              | malate dehydrogenase ( <i>mdh</i> )                                             | 1                             | mdh-1/2                | GACTCGTGAAGAACTGATCG       | AGTCATTGTATCCATCGGGT       |
| 10 BF638R_1473       | -               | [17]                    | lactate dehydrogenase ( <i>ldh</i> )                                            | 1                             | ldh-1/2                | TCGGACCGTATCATNGACGA       | TATTCTCCAGAGTCGTTGCT       |
| 11 BF638R_3133       | -               | This study              | phospho-glycerate kinase ( <i>pgk</i> )                                         | 1                             | pgk-1/2                | TTCGAAAACCTTCACTCACGG      | TACCCGGAAGAACTTTTCTCT      |
| 12 BF638R_1421       | -               | [16]                    | <i>feoAB</i>                                                                    | 3                             | feoAB-1/2              | GCTTCCGTAAACGNATTGTG       | GTGCGNCGCAGAGAGATTTC       |
| 13 BF638R_2696       | 4,1             | [24]                    | flavodoxin ( <i>fldA</i> )                                                      | 1                             | fldA-1/2               | ATTTTACGTTCCACAACGG        | TCTAACTCGTCGTTCACT         |
| 14 BF638R_4500       | -               | This study              | fumarate reductase ( <i>frdA</i> )                                              | 1                             | frdA-1/2               | ATCTGGGTTCGAAGAAGAT        | GCCTTCCAGATAGAAGTCAC       |
| 15 BF638R_4499       | 11,50           | [24]                    | succinate dehydrogenase/fumarate reductase cytochrome b subunit ( <i>frdC</i> ) | 1                             | frdC-1/2               | TGGGCTAAAATGCAGTTACC       | CAGAAACCATGAGTCAGGTG       |
| 16 BF638R_2263       | 2,40            | [24]                    | Crp/Fnr family transcriptional regulator ( <i>crpF</i> )                        | 5                             | crpF-1/2               | CGTGATTTTGACGGAATCG        | TAATCGATCATTTCTCCCCG       |
| 17 BF638R_1544       | -3,20           | [24] <sup>c</sup>       | GNAT family N-acetyltransferase ( <i>gat</i> )                                  | 5                             | gatMZ-1/2 <sup>c</sup> | TTCCCTATCGTAGCATACCC       | TCTGGTGCCACTCTGTATC        |
| 18 BF638R_3194       | 43,12           | This study <sup>c</sup> | pyruvate-flavodoxin/ferredoxin oxidoreductase ( <i>por</i> )                    | 1                             | porMZ-1/2 <sup>c</sup> | ATGACATTCCGTATCCAGGT       | GTTGTTTGCTCTTCACGTTG       |
| Endogeneous controls |                 |                         |                                                                                 |                               |                        |                            |                            |
| 19 BF638R_0945       |                 | This study              | glyceraldehyde-phosphate dehydrogenase ( <i>gap</i> )                           | -                             | gap1/3BF               | AGCCATTGTAGCAGCTTTTT       | GAAGACGGGATGATGTTTC        |
| 20 6 16S rRNA        |                 | This study              | 16S rRNA ( <i>rrn</i> )                                                         | -                             | rrnBF-1/2              | TCCTGTTTGATACCCACACT       | GCTCAACCGTAAAATTGCAG       |
| 21 BF638R_2767       |                 | This study              | <i>rpoD</i>                                                                     | -                             | rpoD_BF1/2             | CCAATCTTCGTTTCGTCGTA       | TTCATCAAACCTCTCGGCAG       |

<sup>a</sup> FC means fold change in the proteomic study. <sup>b</sup> The numbers designate the following pathways - 1: glycolysis, carbohydrate metabolism, redox processes, 2: cell-wall, efflux, virulence, 3: heme/Fe2+ metabolism, 4: protein synthesis, 5: nucleic acids, repair, stress, gene regulation. <sup>c</sup> These items were selected from the different paralog genes of these proteins in the *B. fragilis* genomes based on differential expressions, the pyruvate-ferredoxin oxidoreductase gene here was selected on its differential expression in RNASeq experiments (our unpublished results). <sup>d</sup> Forward (1) and reverse (2) orientations.

**Table S2.** Cross-correlation values of gene expressions metronidazole resistance for eight *nim*-positive *B. fragilis* strains<sup>a</sup>

|              | S3    | <i>acr5</i> | <i>acr15</i> | <i>crpF</i> | <i>frdC</i> | <i>feoAB</i> | <i>fldA</i> | <i>fprA</i> | <i>frdA</i> | <i>galK</i> | <i>gatMZ</i> | <i>ldh</i> | <i>mdh</i> | <i>nanH</i> | <i>porMZ</i> | <i>pgk</i> | <i>relA</i> | MIC <sup>b</sup>   |
|--------------|-------|-------------|--------------|-------------|-------------|--------------|-------------|-------------|-------------|-------------|--------------|------------|------------|-------------|--------------|------------|-------------|--------------------|
| L20          | 0,476 | 0,429       | 0,762        | -0,167      | 0,31        | -0,333       | -0,214      | 0,286       | 0,881       | 0,762       | -0,247       | 0,143      | 0,119      | 0,429       | 0,381        | 0,5        | 0,357       | -0,334             |
|              | 0,207 | 0,26        | 0,0212       | 0,662       | 0,423       | 0,387        | 0,578       | 0,46        | 2E-07       | 0,0212      | 0,537        | 0,705      | 0,749      | 0,26        | 0,321        | 0,182      | 0,353       | 0,387              |
| S3           |       | 0,548       | 0,333        | -0,333      | 0,548       | 0,143        | 0,357       | 0,619       | 0,0952      | 0,738       | 0,577        | -0,119     | 0,429      | 0,0238      | 0,667        | 0,595      | 0,81        | -0,124             |
|              |       | 0,139       | 0,387        | 0,387       | 0,139       | 0,705        | 0,353       | 0,086       | 0,794       | 0,0287      | 0,12         | 0,749      | 0,26       | 0,931       | 0,0588       | 0,102      | 0,0096      | 0,749              |
| <i>acr5</i>  |       |             | 0,286        | -0,0476     | 0,119       | -0,333       | -0,262      | 0,476       | 0,143       | 0,452       | 0,412        | -0,429     | 0,857      | -0,19       | 0,714        | 0,81       | 0,262       | 0,272              |
|              |       |             | 0,46         | 0,885       | 0,749       | 0,387        | 0,498       | 0,207       | 0,705       | 0,233       | 0,29         | 0,26       | 0,00178    | 0,619       | 0,0374       | 0,0096     | 0,498       | 0,498              |
| <i>acr15</i> |       |             |              | 0,0238      | 0,143       | -0,429       | 0,0238      | 0,5         | 0,81        | 0,5         | -0,247       | 0,476      | 0,19       | 0,786       | 0,262        | 0,357      | 0,119       | -0,136             |
|              |       |             |              | 0,931       | 0,705       | 0,26         | 0,931       | 0,182       | 0,0096      | 0,182       | 0,537        | 0,207      | 0,619      | 0,0149      | 0,498        | 0,353      | 0,749       | 0,705              |
| <i>crpF</i>  |       |             |              |             | 0           | -0,619       | -0,119      | -0,452      | 0,0476      | 0,0952      | -0,577       | 0,333      | 0,214      | 0,381       | 0,0952       | 0,286      | 0           | 0,568              |
|              |       |             |              |             | 0,977       | 0,086        | 0,749       | 0,233       | 0,885       | 0,794       | 0,12         | 0,387      | 0,578      | 0,321       | 0,794        | 0,46       | 0,977       | 0,12               |
| <i>frdC</i>  |       |             |              |             |             | 0,0238       | -0,0476     | 0,429       | 0,262       | 0,476       | 0,0825       | -0,167     | -0,167     | 0,0476      | 0,167        | 0,452      | 0,405       | -0,507             |
|              |       |             |              |             |             | 0,931        | 0,885       | 0,26        | 0,498       | 0,207       | 0,839        | 0,662      | 0,662      | 0,885       | 0,662        | 0,233      | 0,29        | 0,182              |
| <i>feoAB</i> |       |             |              |             |             |              | 0,619       | 0,0714      | -0,452      | -0,357      | 0,577        | 0,0476     | -0,357     | -0,548      | -0,5         | -0,619     | 0,0476      | -0,148             |
|              |       |             |              |             |             |              | 0,086       | 0,839       | 0,233       | 0,353       | 0,12         | 0,885      | 0,353      | 0,139       | 0,182        | 0,086      | 0,885       | 0,705              |
| <i>fldA</i>  |       |             |              |             |             |              |             | 0,0952      | -0,333      | 0,0238      | 0,412        | 0,595      | 0,0238     | 0,0952      | -0,119       | -0,333     | 0,429       | 0,309              |
|              |       |             |              |             |             |              |             | 0,794       | 0,387       | 0,931       | 0,29         | 0,102      | 0,931      | 0,794       | 0,749        | 0,387      | 0,26        | 0,423              |
| <i>fprA</i>  |       |             |              |             |             |              |             |             | 0,167       | 0,167       | 0,577        | -0,19      | 0,286      | 0,0952      | 0,286        | 0,357      | 0,0714      | -0,321             |
|              |       |             |              |             |             |              |             |             | 0,662       | 0,662       | 0,12         | 0,619      | 0,46       | 0,794       | 0,46         | 0,353      | 0,839       | 0,423              |
| <i>frdA</i>  |       |             |              |             |             |              |             |             |             | 0,5         | -0,577       | 0,333      | -0,143     | 0,619       | 0,0476       | 0,286      | 0           | -0,383             |
|              |       |             |              |             |             |              |             |             |             | 0,182       | 0,12         | 0,387      | 0,705      | 0,086       | 0,885        | 0,46       | 0,977       | 0,321              |
| <i>galK</i>  |       |             |              |             |             |              |             |             |             |             | -0,0825      | 0,0714     | 0,333      | 0,381       | 0,738        | 0,738      | 0,833       | -0,0865            |
|              |       |             |              |             |             |              |             |             |             |             | 0,839        | 0,839      | 0,387      | 0,321       | 0,0287       | 0,0287     | 0,00526     | 0,794              |
| <i>gatMZ</i> |       |             |              |             |             |              |             |             |             |             |              | -0,412     | 0,412      | -0,577      | 0,247        | 0,0825     | 0,247       | 0,0856             |
|              |       |             |              |             |             |              |             |             |             |             |              | 0,29       | 0,29       | 0,12        | 0,537        | 0,839      | 0,537       | 0,794              |
| <i>ldh</i>   |       |             |              |             |             |              |             |             |             |             |              |            | -0,19      | 0,667       | -0,333       | -0,333     | 0,0714      | 0,272              |
|              |       |             |              |             |             |              |             |             |             |             |              |            | 0,619      | 0,0588      | 0,387        | 0,387      | 0,839       | 0,498              |
| <i>mdh</i>   |       |             |              |             |             |              |             |             |             |             |              |            |            | -0,0714     | 0,738        | 0,69       | 0,31        | 0,667 <sup>c</sup> |
|              |       |             |              |             |             |              |             |             |             |             |              |            |            | 0,839       | 0,0287       | 0,0474     | 0,423       | 0,0588             |
| <i>nanH</i>  |       |             |              |             |             |              |             |             |             |             |              |            |            |             | 0,143        | 0,143      | 0,119       | -0,0618            |
|              |       |             |              |             |             |              |             |             |             |             |              |            |            |             | 0,705        | 0,705      | 0,749       | 0,839              |
| <i>porMZ</i> |       |             |              |             |             |              |             |             |             |             |              |            |            |             |              | 0,857      | 0,667       | 0,185              |
|              |       |             |              |             |             |              |             |             |             |             |              |            |            |             |              | 0,00178    | 0,0588      | 0,619              |
| <i>pgk</i>   |       |             |              |             |             |              |             |             |             |             |              |            |            |             |              |            | 0,5         | 0,124              |
|              |       |             |              |             |             |              |             |             |             |             |              |            |            |             |              |            | 0,182       | 0,749              |
| <i>relA</i>  |       |             |              |             |             |              |             |             |             |             |              |            |            |             |              |            |             | 0,0741             |
|              |       |             |              |             |             |              |             |             |             |             |              |            |            |             |              |            |             | 0,839              |

<sup>a</sup> The colour-coding means the following: yellow –  $0.5 < r < 0.7$ ,  $0.05 > p > 0.001$ , orange:  $r > 0.7$ ,  $p < 0.001$ , , abbreviations in Table S1. <sup>b</sup> Metronidazole MIC. <sup>c</sup> Borderline significance

**Table S3.** Cross-correlation values of gene expressions metronidazole resistance for seven *nim*-negative *B. fragilis* strains<sup>a</sup>

|              | S3     | <i>acr5</i> | <i>acr15</i> | <i>crpF</i> | <i>frdC</i> | <i>feoAB</i> | <i>fldA</i> | <i>fprA</i> | <i>frdA</i> | <i>galK</i> | <i>gatMZ</i> | <i>ldh</i> | <i>mdh</i> | <i>nanH</i> | <i>por</i> | <i>pgk</i> | <i>relA</i> | MIC                 |
|--------------|--------|-------------|--------------|-------------|-------------|--------------|-------------|-------------|-------------|-------------|--------------|------------|------------|-------------|------------|------------|-------------|---------------------|
| L20          | 0,643  | -0,786      | -0,0357      | -0,536      | 0,821       | -0,198       | -0,786      | 0,143       | 0,679       | 0,464       | -0,018       | -0,464     | 0,643      | -0,821      | 0,0357     | 0,964      | 0,536       | 0,128               |
|              | 0,0956 | 0,0251      | 0,905        | 0,181       | 0,0145      | 0,602        | 0,0251      | 0,72        | 0,0735      | 0,255       | 0,905        | 0,255      | 0,0956     | 0,0145      | 0,905      | 2E-07      | 0,181       | 0,72                |
| S3           |        | -0,107      | 0,607        | -0,25       | 0,5         | -0,577       | -0,429      | -0,214      | 0,679       | 0,857       | 0,0541       | -0,0357    | 0,25       | -0,321      | 0          | 0,75       | 0,5         | 0,0551              |
|              |        | 0,781       | 0,121        | 0,545       | 0,217       | 0,15         | 0,297       | 0,602       | 0,0735      | 0,00609     | 0,843        | 0,905      | 0,545      | 0,438       | 0,968      | 0,0384     | 0,217       | 0,843               |
| <i>acr5</i>  |        |             | 0,464        | 0,536       | -0,75       | -0,018       | 0,821       | -0,179      | -0,286      | 0,0714      | -0,234       | 0,714      | -0,679     | 0,893       | 0,179      | -0,714     | -0,214      | 0,147               |
|              |        |             | 0,255        | 0,181       | 0,0384      | 0,905        | 0,0145      | 0,66        | 0,491       | 0,843       | 0,545        | 0,0545     | 0,0735     | 2E-07       | 0,66       | 0,0545     | 0,602       | 0,72                |
| <i>acr15</i> |        |             |              | 0,429       | 0,143       | -0,18        | -0,0357     | -0,0357     | 0,5         | 0,321       | 0,252        | 0,571      | -0,0357    | 0,0714      | 0,321      | 0,0714     | 0,464       | -0,257              |
|              |        |             |              | 0,297       | 0,72        | 0,66         | 0,905       | 0,905       | 0,217       | 0,438       | 0,545        | 0,15       | 0,905      | 0,843       | 0,438      | 0,843      | 0,255       | 0,545               |
| <i>crpF</i>  |        |             |              |             | -0,143      | 0,631        | 0,536       | 0,0357      | 0,214       | -0,357      | 0,27         | 0,857      | 0          | 0,464       | 0,643      | -0,607     | 0,25        | 0,0551              |
|              |        |             |              |             | 0,72        | 0,0956       | 0,181       | 0,905       | 0,602       | 0,388       | 0,491        | 0,00609    | 0,968      | 0,255       | 0,0956     | 0,121      | 0,545       | 0,843               |
| <i>frdC</i>  |        |             |              |             | 0           |              | -0,786      | 0           | 0,75        | 0,143       | 0,432        | -0,321     | 0,643      | -0,857      | 0,107      | 0,75       | 0,5         | -0,128              |
|              |        |             |              |             |             | 0,968        | 0,0251      | 0,968       | 0,0384      | 0,72        | 0,297        | 0,438      | 0,0956     | 0,00609     | 0,781      | 0,0384     | 0,217       | 0,72                |
| <i>feoAB</i> |        |             |              |             |             |              | 0,252       | 0,595       | 0,18        | -0,667      | -0,0909      | 0,523      | 0,324      | 0,0541      | 0,775      | -0,396     | 0,36        | 0,232               |
|              |        |             |              |             |             |              | 0,545       | 0,121       | 0,66        | 0,0735      | 0,781        | 0,181      | 0,438      | 0,843       | 0,0251     | 0,341      | 0,388       | 0,602               |
| <i>fldA</i>  |        |             |              |             |             |              |             | -0,214      | -0,393      | -0,0714     | -0,378       | 0,607      | -0,607     | 0,964       | 0,214      | -0,821     | -0,357      | 0,496               |
|              |        |             |              |             |             |              |             | 0,602       | 0,341       | 0,843       | 0,341        | 0,121      | 0,121      | 2E-07       | 0,602      | 0,0145     | 0,388       | 0,217               |
| <i>fprA</i>  |        |             |              |             |             |              |             |             | 0,179       | -0,393      | -0,36        | 0,25       | 0,429      | -0,286      | 0,607      | 0,0714     | 0,571       | -0,0367             |
|              |        |             |              |             |             |              |             |             | 0,66        | 0,341       | 0,388        | 0,545      | 0,297      | 0,491       | 0,121      | 0,843      | 0,15        | 0,905               |
| <i>frdA</i>  |        |             |              |             |             |              |             |             |             | 0,393       | 0,0901       | 0,286      | 0,607      | -0,464      | 0,607      | 0,607      | 0,857       | 0,239               |
|              |        |             |              |             |             |              |             |             |             | 0,341       | 0,781        | 0,491      | 0,121      | 0,255       | 0,121      | 0,121      | 0,00609     | 0,545               |
| <i>galK</i>  |        |             |              |             |             |              |             |             |             |             | -0,252       | -0,0714    | 0          | 0,0357      | -0,143     | 0,571      | 0,214       | 0,385               |
|              |        |             |              |             |             |              |             |             |             |             | 0,545        | 0,843      | 0,968      | 0,905       | 0,72       | 0,15       | 0,602       | 0,341               |
| <i>gatMZ</i> |        |             |              |             |             |              |             |             |             |             |              | -0,144     | 0,306      | -0,306      | -0,27      | 0,0541     | -0,018      | -0,722 <sup>c</sup> |
|              |        |             |              |             |             |              |             |             |             |             |              | 0,72       | 0,438      | 0,438       | 0,491      | 0,843      | 0,905       | 0,0545              |
| <i>ldh</i>   |        |             |              |             |             |              |             |             |             |             |              |            | -0,0714    | 0,571       | 0,786      | -0,5       | 0,429       | 0,257               |
|              |        |             |              |             |             |              |             |             |             |             |              |            | 0,843      | 0,15        | 0,0251     | 0,217      | 0,297       | 0,545               |
| <i>mdh</i>   |        |             |              |             |             |              |             |             |             |             |              |            |            | -0,643      | 0,357      | 0,607      | 0,75        | -0,11               |
|              |        |             |              |             |             |              |             |             |             |             |              |            |            | 0,0956      | 0,388      | 0,121      | 0,0384      | 0,781               |
| <i>nanH</i>  |        |             |              |             |             |              |             |             |             |             |              |            |            |             | 0,0714     | -0,786     | -0,393      | 0,349               |
|              |        |             |              |             |             |              |             |             |             |             |              |            |            |             | 0,843      | 0,0251     | 0,341       | 0,388               |
| <i>por</i>   |        |             |              |             |             |              |             |             |             |             |              |            |            |             |            | -0,107     | 0,75        | 0,404               |
|              |        |             |              |             |             |              |             |             |             |             |              |            |            |             |            | 0,781      | 0,0384      | 0,341               |
| <i>pgk</i>   |        |             |              |             |             |              |             |             |             |             |              |            |            |             |            |            | 0,5         | -0,0184             |
|              |        |             |              |             |             |              |             |             |             |             |              |            |            |             |            |            | 0,217       | 0,905               |
| <i>relA</i>  |        |             |              |             |             |              |             |             |             |             |              |            |            |             |            |            |             | 0,11                |
|              |        |             |              |             |             |              |             |             |             |             |              |            |            |             |            |            |             | 0,781               |

<sup>a</sup> The colour-coding means the following: yellow –  $-0.5 < r < 0.7$ ,  $0.05 > p > 0.001$ , orange:  $r > 0.7$ ,  $p < 0.001$ , abbreviations in Table S1. <sup>b</sup> Metronidazole MIC.

. <sup>c</sup> Borderline significance

**Fig. S1.** The tricarboxylic acid pathways of *B. fragilis*

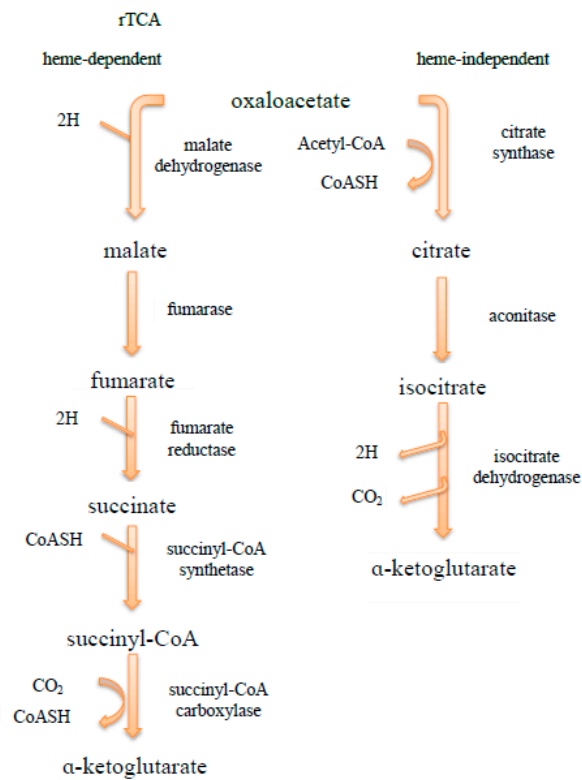

**Fig. S2.** Examples of the Etest results on modified M9 medium

*B. fragilis* 638R (A) and *B. fragilis* 638R/*nimA* (B) on glucose-supplemented M9 medium, respectively.

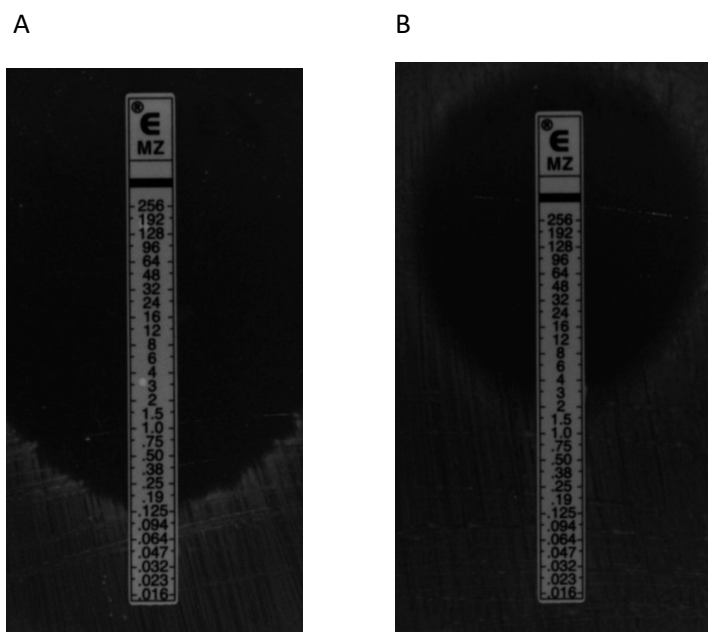

**Table S4.** Effects of C<sub>4</sub> dicarboxylic acid supplementation on metronidazole MICs of selected *nim*-positive and negative *B. fragilis* strains

| Strain            | <i>nim</i>  | Media (MICs in µg/ml)    |                   |       |       |       |       |
|-------------------|-------------|--------------------------|-------------------|-------|-------|-------|-------|
|                   |             | SCA                      | M9-G <sup>a</sup> | M9-O  | M9-M  | M9-F  | M9-S  |
| 638R              | -           | 0.125                    | 0.25              | 0.064 | 0.032 | 0.032 | 0.032 |
| 638R/ <i>nimA</i> | <i>nimA</i> | 4                        | 4                 | 4     | 4     | 2     | 4     |
| KSB-R             | <i>nimB</i> | 16                       | >256 <sup>b</sup> | 16    | 256   | 16    | >256  |
| 19811             | -           | 32                       | >256              | 64    | >256  | 16    | >256  |
| 18807i2           | -           | (0.25-)>256 <sup>c</sup> | 0.5               | 0.25  | 0.125 | 0.125 | 0.125 |
| Q5                | <i>nimE</i> | >256                     | >256              | >256  | >256  | 256   | >256  |

<sup>a</sup> M9 media supplemented with glucose (G), oxaloacetic acid (O), malate (M), fumarate (F) and succinate (S).

<sup>b</sup> Significantly increased metronidazole resistance values are highlighted in yellow. <sup>c</sup> Heterogeneous resistance phenotype.
